# Supplementary material for: Emission of floral volatiles is facilitated by cell-wall non-specific lipid transfer proteins
Source: PubMed Central journal article supplement (PMC9852552; doi:10.1038/s41467-023-36027-9), 2023-01-19
Supplement: 41467_2023_36027_MOESM2_ESM.pdf [file 41467_2023_36027_MOESM2_ESM.pdf]

## **Description of Additional Supplementary Files:**

**Supplementary Data 1:** Sequences of mature nsLTP proteins used for the phylogenetic analysis presented in Supplementary Figure 1.

**Supplementary Data 2:** Sequences of mature nsLTP proteins used for the phylogenetic analysis presented in Figure 1b.
