# Supplementary material for: Emission of floral volatiles is facilitated by cell-wall non-specific lipid transfer proteins
Source: PubMed Central journal article supplement (PMC9852552; doi:10.1038/s41467-023-36027-9), 2023-01-19
Supplement: 41467_2023_36027_MOESM3_ESM.pdf [file 41467_2023_36027_MOESM3_ESM.pdf]

**Supplementary Data 1: Sequences of mature nLTP proteins used for the phylogenetic analysis presented in Supplementary Figure 1.**

>AtLTP1.1

ALSCGEVNSNLKPCTGYLTNGGITSPGPQCCNGVRKLNMGVLLDRRQACRCIKNAARNPGLNADR  
AAGIPRRCGIKIPYSIRFNTKCNTY

>AtLTP1.10

AISCNAVQANLYPCVVYVQGGAIPIYSCCNGIRMLSQATSDKQGVCRCIKSVVGRSSIYLKAAALP  
GKCGVKLPYKIDPSTNCNSI

>AtLTP1.11

AITCGTVASSLSPCLGYLSKGGVPPPCCAGVKKLNGMAQPDRQQACRCLQSAAKGVNPSLASGLP  
GKCGVSIPYPISTSTNCATI

>AtLTP1.12

AISCGTVAGSLAPCATYLSKGLVPPSCCAGVKTLSMAKPDRQQACRCIQSTAKSSGLNPSLASGLP  
GKCGVSIPYPIISMSTNCNNI

>AtLTP1.3

AISCSVVLQDLQPCVSYLTSGSGNPPETCCDGVKSLAAATTADKKAACQCIKSVANSTVKPELAQALA  
SNCGASLPVDASPTVDCTTV

>AtLTP1.4

LMSCGTVNGNLGACIAYLTRGAPLTQGCCNGVTNLKNMASPDRQQACRCLQSAAKAPGLNTARA  
AGLPSACKVNIPYKISASTNCNTV

>AtLTP1.5

ALSCGSVNSNLAACIGYVLQGGVIPPACCSGVKNLNSIAKPDRQQACNCIQGAARASGLNAGRAAG  
IPKACGVNIPYKISTSTNCKTV

>AtLTP1.6

AVSCNTVIADLYPCLSYVTQGGVPPTLCCNGLTTLKSQAQVDRQGVCRCIKSAIGGSPRTIQNALELP  
SKCGVDLPYKFSPTDCDSI

>AtLTP1.7

TIQCGTVTSTLAQCLTYLTNSGPLPSQCCVGVKSLYQLAQPDRKQVCECLKLAGKEKGLNTDLVAALP  
TTCGVSIPYPIFSSTNCDSI

>AtLTP1.8

AISCGAVTGS LGQCYNYLTRGGFIPRGCCSGVQRLNSLARRDRQQACRCIQGAARASRLNAGRAAR  
LPGACRVRISYPISARTNCNTV

>AtLTP1.9

IACPQVNMYLAQCLPYLKAGGNPSPMCCNGLNSLAAAAPADRQVACNCLKSVANTGINDDFAKQL  
PAKCGVNIGVPPFSKTVCNSI

>AtLTP2.1

KVACIVTDLQVCLSALETPPPSAECCKNLKIQKSLCDYMENKYLEPARKVFAACGMPYPRE

>AtLTP2.10

KAACIVTNLMSCLPAILKGSQPPAYCCEMLKEQQSCLCGYIKSHYVIPQNAHKLLAACGILYPKC

>AtLTP2.11

NVTCDATQLSSCVTAVSTGAPPSTDCCGKLKEHETCLCTYIQNSYVTSPNARKTLAACDVAYPTC

>AtLTP2.12

DVTCDAVQLSSCATPMLTGVPVPPSTECCGKLKEQQPCFCTYIKDQYVGSANAKKTLATCGVPYPTC

>AtLTP2.13  
TQSCVPMELMPCLPAMTKREQPTKDCENLIKQKTCLCDYIKNMFTISLVARKVLETCNVPYTSC

>AtLTP2.14  
SSSCIPTELMPCLPAMTTGGQPTKDCCKLIEQKECLCGYINNTFVSSPVARKVLEVCNIPYPSC

>AtLTP2.2  
KATCDFTKFQVCKPEIITGSPPEECCEKLKEQQSCLCAYLISQYIGNAKRVIRACGIPFPNCS

>AtLTP2.3  
KVACTVTELQPCLPSVIDGSQPSTQCCEKLKEQNSCFCDYLQNQYITAAKQILAACKIPYPNC

>AtLTP2.4  
GVTCSMQLASCAAAMTSSSPPEACCTKLREQQPCLCGYMRNQYVSSPNARKVSNSKIPSPSC

>AtLTP2.5  
GVTCDARQLQPCLAAITGGGQPSGACCAKLTEQQSCLCGFAKNQYISSPNARKVLLACNVAYPTC

>AtLTP2.6  
VDPCNPAQLSPCLETIMKGSEPSDLCCSKVKEQQHCICQYLKNSFLNSPNAKIIATDCHCPYPKC

>AtLTP2.7  
KVVCIVTDLRVCLPAVEAGSQPSVQCCGKLKEQLSCLCGYLKIQYVSSGKAQKVLTAIPAIPKC

>AtLTP2.9  
AVTCSMQLSPCATAITSSSPSALCCAALKEQRPCLCGYMRNRFVSTPNARKVSKSCKLPIPRC

>AtLTPc1  
QQCRDELSNVQVCAPLLLPGAVNPAANSNCCAALQATNKDCLCNALRAATTLTSLCNLPSFDCGIS

>AtLTPc3  
AQECGNLANVQVCAAMVLPGSGRPNSECCAALQSTNRDCLCNALRAATSLPSLCNLPPVDCGIN

>AtLTPd1  
IDLCGMSQDELNECKPAVSKENPTSPSQPCCTALQHADFACLCGYKNSPWLGSFGVDPELASALPK  
QCGLANAPTC

>AtLTPd10  
QGTCQGDIELMKECAVYVQRPGPKVSEACCRVVKRSDIPCACGRITASVIDMDKVVHVTAFCGKPL  
AHGKCGS

>AtLTPd11  
AQVCGANLSGLMNECQRYVSNAGPNSPSRSCCALIRPIDVPCACRYVSRDVIDMDKVVYVARSCGK  
KIPSGYKCGSK

>AtLTPd12  
GERCNDSGIEVLRGCPDSIDKELPTPPSQGCCTLVRIIGMECVCEVINKEIIDMQKLVNVAACGRPLA  
PGSQCGS

>AtLTPd2  
IDLCGMTQAELNECLPAVSKNNPTSPSLLCCNALKHADYTCLCGYKNSPWLGSFGVDPKLASSLPKE  
CDLTNAPTC

>AtLTPd3  
MSICDMDINDMQCRPAITGNNPPPPVNDCCVVVRKANFECLCRFKFYLPILRIDPSKVVALVAKCG  
VTTVPRSCQV

>AtLTPd4  
IPVCNIDTNDLAKCRPAVTGNNPPPPGPDCCAVARVANLQCLCPYKPYLPTVGIDPSRVRPLLACG  
VNSPSCF

>AtLTPd5

ITACNINANHLEKCRPAVIGDNPPSPIKECCCELLQAANLKCICRFKSVLPVLAVYPSKVQALLSKCGLTTI  
PPACQAL  
>AtLTPd9  
RKGCYDLGITVLMGCPDSIDKKLPAPPSEGCCTLVRTIGMKCVCEIVNKKIIDMQKLVNVAACGRPL  
APGSQCGS  
>AtLTPg1  
QAGCRDRTLSPCLYYLNGGSSSPSWSCCRQFSTVQSSPECLCSVWNSESSFYGFKNRTLALNLPT  
ACNVQTPSPSLCNTG  
>AtLTPg10  
PATCASRLLSLAPCGPFVQGFAQLPAQPCCDSLNIYSQEATCLCLFLNNTLSFPINQTLALQLPPLCN  
IPANSSTCSSS  
>AtLTPg11  
AVDCSSLILNMADCLSFVTSGSTVVKPEGTCCSGLKTVVRTGPECLCEAFKNSLGLTDLSDKAASLPSV  
CKVAAPPSARGLS  
>AtLTPg12  
PVNCLVSMNLNVSDCFSYVQVGSNEIKPEAACPELAGMVQSSPECVCNLYGGSPRFGVKLDKQRAE  
QLSTICGVKAPSPSLCSVL  
>AtLTPg13  
KEECTAQLVGMATCLPYVQGKAKSPTDCCSGLKQVINSMDKCLCMIIQENDPDLGLQVNVSLALAL  
PSVCHATADITKCPAL  
>AtLTPg14  
KEECTEQLVGMATCLPYVQGQAKSPTDCCSGLKQVLNSNKKCLCVIIQDNDPDLGLQINVSALAL  
PSVCHAAADVTKCPAL  
>AtLTPg15  
SSSCVSTLTLSPCLSYITGNSTTPSQPCCSRLDSVIKSSPQCICSAVNSIPNIGLNINRTQALQLPNACN  
IQTPLTQCNA  
>AtLTPg16  
STPCTSSMISTFTPCLNFITGSSGTPTAGCCDSLKTLTNTGMGCACLILTAVPLPTGFINRTLALALPRAC  
KMGGVPIQCQAA  
>AtLTPg19  
QSSCTNALISMSPCLNYITGNSTSPNQCCNQLSRVVQSSPDCLCQVLNNGGSQGINVNQTQALGL  
PRACNVQTPPVSRCNTG  
>AtLTPg2  
NTPCSPSMLSSVTGCTSFVTGGFPTSDCCGALKSLTGTGMDCLCLIVTAVPISIPINRTLALSLPRACGIP  
GVPVQCKAS  
>AtLTPg20  
LSQCTPSMMTTVSPCMGFITNSSSSPSSDCCNSLRSLTTGGMGCLCLIVTGVFNIPIINRTTAVSLPRA  
CNMMPRVPLQCQAN  
>AtLTPg21  
APDCMANLMNMTGCLSYVTVGEAGAAKPKDTCPPALAGLVESSPQCLCYLLSGAAQLGKIDKAKA  
LKLPGVCGVITPDPSLCSLF  
>AtLTPg22  
IKGCQDAMSDLYSCLPFVTNKAKAPDSTCCSTLKVKIDKGQTRKCLCTLVKDDDPGLGFKVDANRAM  
SLPSACHVPANISQCPDL

>AtLTPg23  
SSDCSTVIYSMMMDCLGYLGVGSNETKPEKSCCTGIETVLQYNPQCICAGLVSAGEMGIELNSTRALAT  
PKACKLSIAPPHCGII

>AtLTPg26  
QSSCTNVLISMAPCLSFITQNTSLPSQQCCNQLAHVVRYSSECLCQVLDGGSQGLGINVNETQALALP  
KACHVE

>AtLTPg29  
ASDCDTLVITLFPCLPFISIGGTADTPTASCCSSLNILDTPICLCEGLKKGKIKLNVTKSATLPVACKLNA  
PPVSACDSL

>AtLTPg31  
SVDCSTLILNMADCLSFVSSGGTVAKPEGTCCSGLKTVLKADSQCLCEAFKSSLGVTLNITKASTLPAA  
CKLHAPSIATCGLS

>AtLTPg5  
STDCSSVIYSMVDCLSFLTGVSTDPSPKTCVGVKTVLNYSKCLCSALESSREMGFVLDLTKALAMP  
KICNVPIDPNCDVS

>AtLTPg6  
REECTNQLIELSTCIPYVGGDAKAPTKDCCAGFGQVIRKSEKVCILVRDDDPQLGIKINATLAAHLPSA  
CHITAPNITDCISI

>OsLTP1.1  
AVQCGQVMQLMAPCMPYLAGAPGMTYPYICCDLSGLVLRMAPADRVAVCNCVKDAAAGPAVD  
FSRASALPAACGLSISFTIAPNMDCNQV

>OsLTP1.10  
AITCGQVNSAVGPCLTYARGGAGPSAACC SGVRS LKAAASADRRTACNCLKNAARKGLNAGNAASI  
PSKCGVSVPYTISASIDCSR

>OsLTP1.12  
AITCGQVNSAVGPCLTYARGGAGPSAACC SGVRS LKAAASADRRTACNCLKNAARKGLNAGNAASI  
GKCGVNVGFPISLSTDCSKV

>OsLTP1.13  
AITCGQVNSAVGPCLTYARGGAGPSAACC SGVRS LKAAASADRRTACNCLKNAARKGLNAGNAASI  
PGKCGVNVGFPISLSTDCNKV

>OsLTP1.14  
ITCGQVNSAVGPCLTYARGGAGPSAACC SGVRS LKAAASADRRTACNCLKNAARKGLNAGNAASI  
IPSKCGVSVPYTISASIDCSR

>OsLTP1.15  
AVTCGQVNSAVGPCLTYARGGAGPSAACC SGVRS LKAAASADRRTACNCLKNAARKGLNAGNAASI  
GIPSKCGVNVGFPISLSTDCSKV

>OsLTP1.16  
AVSCGDVTSSIAVSPCLSYVMGREGSSSSCCSGVRTLNKASADRRTACNCLKNMASRNLNMGNAASI  
PSKCGVSVAFPISTVDCSKI

>OsLTP1.17  
ISCGQVNSAVSPCLSYARGGAGPSAACC SGVRS LKAAASADRRTACNCLKNVAGSGLNAGNAASIP  
SKCGVSVIPYTISSIDCSSV

>OsLTP1.18  
ITCGQVNSAVGPCLTYARGGAGPSAACC SGVRS LKAAASADRRTACNCLKNAARKGLNAGNAASIP

SKCGVSVPYTISASIDCSR

>OsLTP1.19

AITCGQVGSIAIPCISYVTGRGGLTQGCCNGVKGLNNAARADRQAACRCLKTLAGKSLNLGAAAGIP  
GKCGVNVGFPISLSTDCRSA

>OsLTP1.2

AISCSAVYNTLMPCLPYVQAGGTVPRACTGGIQLLAAANPDRRTICGCLKNVANGGPYITRAAALP  
SKCNVSLPYKISTSVNCNAI

>OsLTP1.20

AITCGQVGSIAIPCISYVTGRSGLTQGCCNGVKGLNNAARADRQAACRCLKSLAGKSLNLGTVAGV  
PGKCGVNVGFPISLSTDCNKV

>OsLTP1.3

VSCGDAVSALAPCGPFLGGAARPGDRCCGGARALRGMAGEARRALCRCLEQSGPSFGVLPDRARR  
LPALCKLGLAIPVGAATDCSKI

>OsLTP1.4

ALSCSTVYNTLLPCLPYVQSGGAVPAACCGGIRSVVAAARADRRRAACTCLKNVAAGGPYISRAAGLP  
GRCGVSVPFKISPNVNCNAV

>OsLTP1.6

SVSCSDVVADVTPCLGFLQGDDHPSGECDDGLSGLVAAAAEDRQAACECLKSAVSGTAVEAAPAR  
DLPADCGLSLPYTFSPDVDCSQS

>OsLTP1.7

AVTCGDVDASLLPCVAYLTGKAAAPSGDCCAGVRHLRTPVAERRFACDCVKKAAAKGLNGDAIRD  
LPAKCAAPLPFPLSLDFDCNTI

>OsLTP1.8

VTGGQVVSMLAPCIMYATGRVSAPTGGCCDGVRTLNSAAAADRQTTCACLKQQTSGGLRPDLVAG  
IPSKCDVNIPYAISPSTDCSRV

>OsLTP1.9

AVSCGDVTSSIAPCLSYVMGREGSPSSCCSGVRTLNKASADRRTACSKLNMASRNLMGNAASI  
PSKCGVSVAFPISTSVDCSKI

>OsLTP2.1

ATKCDPLALRPCAAAILWGEAPSTACCAGLRAQKRCLCRYAKNKYINSQNSRKVAAACSVPAAPRC

>OsLTP2.10

PVQCDPGKLSACAVPIFFGTAPSKSCCSNLRAQEDGCFQYARDSYINSTNARNTIAACGIAFPSC

>OsLTP2.11

AAQCDPEQLSACVSPIFYGTAPSESCCSNLRAQQEGCLCQYAKDSYVNNNTNARKTIAACGIPIPSC

>OsLTP2.12

TAQCNAGQLAICAGAIIGGSTPSASCCSNLRAQRGCFQYARNSYINSANARKTLTSCGIAIPRC

>OsLTP2.13

PSRCNPTLLTPCAGPALFGGPVPPACCAQLRAQAACLCAARSSYIRSPNARRLFAVCGLPMPQCS

>OsLTP2.2

KASCDLMQLSPCVSAFSGVGQGSPSSACCSKLKAQGSSCLCLYKDDRIVSSNRTKRVFTACKVPAPN  
C

>OsLTP2.3

GAGCNAGQLTVCTGAIAGGARPTAACSSLRAQQGCFQYAKDRYVNSPNARKAVSSCGIALPTCH

>OsLTP2.4

EAACDALQLSPCASAIIGNASPSASCCSRMKEQQPCLCQYARDRYVNSPNGKKVLAACHVPVPSC  
>OsLTP2.5  
AATCTPTQLTPCAPAIVGNSPPTAACCGKKAHPASCFCQYKKDKYVNSPNGKKVFATCKVPLPKC  
>OsLTP2.6  
AAGCNPSALSPCMSAIMLGAAPSPGCCVQLRAQQPCLCQYARDSYVTSPSAQRAVKACNVKANC  
>OsLTP2.7  
PPQCDPGLLSPCAAPIFFGTAPSASCCSSLKAQQGCFQYAKDSYINSTNARKMIAACGIPLPNCG  
>OsLTP2.8  
PPQCDPGLLSPCAAPIFFGTAPSASCCSSLKAQQGCFQYAKDSYINSTNARKMIAACGIPLPNCG  
>OsLTP2.9  
LVVCDPGLLSPCAAPIFFGTAPSASCCSSLKAQQGCFQYAKDSYINSTNARKMIAACGIPFPNCS  
>OsLTPc1  
GGECVPQLNRLACRAYAVPGAGDPSAECCSALSSISQGCACSAISIMNSLPSRCHLSQINCSA  
>OsLTPc2  
QPSCAAQLTQLAPCARVGVAPAGQPLPPAECCSALGAVSHDCACGTLDIINSLPAKCGLPRVTCH  
>OsLTPd1  
FMVCGVDADRMAADCGSYCRAGSRERPRECCDAVRGADFKCLCKYRDELVRMGNIDAARAMQI  
PSKCRIGAPKSC  
>OsLTPd10  
DEGCSRDLQDLIMECQKYVMNPANPKISNACCSVIQKANVPCLCSKVTKIIVCMEKVVYVADYCKKP  
LQPGSKCGR  
>OsLTPd12  
ADKCEKDLDLLMGSCGYLRFPAEAKASRACCGAVRRVDVGCLCGMVTPEVVCMDKAVYVAAYCH  
RPLLPGSYCGS  
>OsLTPd2  
LSMCGVDRSAVALCRSYCTVGSAEKPTKECKAVANADFQCLCDRRDMLRNLENIDADRATQIPSK  
CGVPGASSCK  
>OsLTPd3  
RAVCNMSNDEFMKCQPAAAATSNPTTPSAGCCSALSHADLNCLCSYKNSPWLSIYNIDPNRAMQL  
PAKCGLTMPANC  
>OsLTPd4  
HGICNLSDAGLQACKPAAAVRNPADPSSECCDALAAADLPCLCRYKGSAGWVRFYIDLNRAMTLP  
GKCGLTLPABC  
>OsLTPd9  
SGDCSSDVQDLMANCQDYVMFPADPKISQACCAAVQRANMPCVCNKVIPEVICMDKVYVVAFC  
KKPFQPGSNCGS  
>OsLTPg1  
SPACMDAVLNMSDCLTYVMINGSTARKPDEPCCPELAGLLESKPVCLCQLLAGSSYDISVDYKRAMAL  
PGICGLAAPPVTACALL  
>OsLTPg10  
KAECADKLMALATCLTYVEEKATAPTRDCCAGLGQVVAGSKKCLCVLVKDDEPALGFRINVTRAMD  
PSGCSIAATFSDCPKM  
>OsLTPg12  
DQACLTALLNMSDCLTYVQNGSRARRPDKPCPELAGLVESNPVCLCELLSGDSYGIADVYSRALAL

PAICRVSTPPVSTCAAF

>OsLTPg14

SGSCMTEIISLASCLGYMSGNSSAPKPSCTALSSVVTSKPACLCAVLGGASSLGVTINNTRALELPAA  
CNVKTTPPASQCSTV

>OsLTPg15

NNGCSSVMMTLSPCLDYISGKSPIEFTCCTTLAGVVQSDPRCLCMVLDSAASFGISINHTRALELPGV  
CKVQAPPISQCTAV

>OsLTPg16

QSGCTSEMVSLAPCLDYMQGNASRPTASCCAALSSVVKSRPECLCAVLGGASSLGVTVNTTRALELP  
AACGVKTPPPSECSKV

>OsLTPg17

AASCTASLITSFTPCFNFITSSSGGAPTAECCQSVAAMINTSASCACLVLTVPLGIPINRTLAVTLPKA  
CNSMSVPLQCKDT

>OsLTPg18

TSGCTQTLLSMSPCLNYLTGNETAPSASCCGKLGEVVKSQPECLCVALNATAALGLSINRTRALGLPD  
ACKVQTPPVSNCKSG

>OsLTPg19

RAECADKLMALSTCLTFVQDGASGAPTPDCCSGLKAVLAASRKCLCVLIKDDDPNLGLKINVTKALS  
PQLCNAPANISDCPRL

>OsLTPg2

RTECADQLVGLAPCLQYVQGEAKAPAPDCCGGLRQVLGKSPKCLCVLVKDDDPNLGIKINATLALAL  
PSACGATHANVSHCPQL

>OsLTPg20

SGACTAVLAKLADCVQYATAGSPLRQPPGSCCTEVERGVKDPAAVGCVCTLLAGNTYGLPLNLTRAA  
GLPAACGAPPTALSNCNVP

>OsLTPg21

ASDCGSSITALAGCLTYITPGSPEARPAKDCCAGVKSALGSPAACVACLCGALGQDFGIKINYTRAAALP  
AACGGDSSALSCKNKK

>OsLTPg25

ATTCVASLLELSPCLPFFKDKAATAAPEGCCAGLSSIVKGEAVCLCHIVNHTLEAIGVDIPVDRAFALLR  
DVCRLSPPADIISTCA

>OsLTPg3

AADCTDALLSLAGCLSYYVQEGSTVAKPDAPCCSGLKGVVKEVACLCCQAFQGNFVTLNMTKALQL  
PAACKVKTTPPFSKCHLS

>OsLTPg4

ELDCTGALLNLSSCLTYVEYRSTLTRPDKGCCGALAGVVDGEAACLCGLVGGAYGVRVDAVRALALP  
TICRVDAPPRLCAAL

>OsLTPg5

AVDCTAAEALKVGACLDYVTPGNPPRSQPSKACCGEVKGVKDIAGVGCLCAAISTHALPLPINATRV  
LHLPAACGADASAFTMCLGQ

>OsLTPg6

AVDCTAEALKLADCLDYVTPGKTAPSRPSKLCCGEVKGALKDSAAVGCCLCAAFSTKTLPLPINITRALH  
LPAACGADASAFSKCLAP

>OsLTPg7

QTGCTAALINLYPCLNYISGNETSPTTRCCSQLATVVQSQPQCLCAAISGSSSSIGGVTIDKTRALELPK  
ACNVVTPPASRCNSA  
>OsLTPg8  
ATSCTASLITFTFPCLNFTVGTSTNGGSPTQQCCGSLAEMVRSSADCACLITGVFPFSLPINRNLAISLTK  
LCNSMSVPLQCRDT  
>OsLTPg9  
GSGCMPELVSLSPCMGYMSGNATAPAAACCSALSGVLRSSPRCLCMVLGTAASLGVAVDTARAALL  
PGACSVQAPPASQCNA  
>Ph19536  
AMTCGQVQVGVVSCLPYLTNHGPLGSCCSVTKGLVTAAKTPQDRRTACACVKSALNTIKGIDLSKAA  
GLSDVCHANIPFKPSLSTDCSRVN  
>Ph18755  
LTCGQVTSNLAPCLPYLRNTGSLGGCCGGVKGLVNAAKSKQDRQTACGCLQQAASIKGINLSKAA  
GLPSTCGVNIPYIPSPSTDCSKVQ  
>Ph18086  
ATITCSTVYSGLEPCLNYVVGKVPSECCNGLKSLLSARTTKDLQRACYCVKSVASSVTGAQISRA  
ASIPGICKARIPFKISPVDVDCSKIK  
>Ph25985  
INCGQVDATLVPCVPYLTQGGTPASPCCDGVKRLIQMTPTQQDRQDACECVKAAAARYTNLKPDA  
ATNLPSRCGVTTNIPISATTNCKSIP  
>Ph36151  
AIPCGTVDMKAACISYATGKDAKPSAPCCSGLQQLAQSVKSVDDKKAICRCLKAGVKNFAGVQDK  
FLSQLPTACKIKVGFVSMNTNCETIHM  
>Ph3757  
AISCGQVVTSLRSCIAYVKQGGALPVACCSGIKSLNSQATTTTPDRQAACSCIKSAAGSINGINFLASSL  
PSKCGVNLPYKINPKINCSTVQ  
>Ph45320  
AVSCGMVATDLYPCLGYVRAGGAIPVECCSGIRSLFSAASTTSDRQTVNCNCMKAAGAISGVNLNLA  
AGLPSKCGVNIPYKISPSIDCNNSLCLRANTLQKMKLAIFIVAMCMAAMAVMLSTPHAEAAISCGQ  
VVSSLEPCISYVTKGSLPTPCCDGIKTLNSQASTTPDRQAACNCIKSAAESINGINLKAASLPSDCGF  
TKIYERRNT  
>Ph33937  
SNDEIQCKDIAEPMKPCVDWLTTGYKRTGVPPGACCTQMSSLNSTIAKNPDDTTAICKCVKSTISNLH  
INDIVAQSLPGRCLITLPPFPTPKVKCSKIK  
>Ph13380  
MVVAPHAEALTCGQVTAGLAGCLPYLQNKGPIGSCCGGVKGLLSAAKTPADRKTACTCLKSAANAI  
KGINPGKAAGLPAACGVNIPYKISPSTDCSRYVICSVYYCVSFNFYDQCILI
