# Supplementary material for: Emission of floral volatiles is facilitated by cell-wall non-specific lipid transfer proteins
Source: PubMed Central journal article supplement (PMC9852552; doi:10.1038/s41467-023-36027-9), 2023-01-19
Supplement: 41467_2023_36027_MOESM4_ESM.pdf [file 41467_2023_36027_MOESM4_ESM.pdf]

**Supplementary Data 2: Sequences of mature nLTP proteins used for the phylogenetic analysis presented in Figure 1b.**

>PhnsLTP1

AMTCGQVQVGVVSCLPYLTNHGPLGSCCSVTKGLVTAAKTPQDRRTACACVKSA LNTIKGIDLSKAA  
GLSDVCHANIPFKPSLSTDCSRVN

>PhnsLTP2

LTGQVTSNLAPCLPYLRNTGSLGGCCGGVKGLVNAAKSKQDRQTACGCLQQA AKSIKGINLSKAA  
GLPSTCGVNIPYPISPSTDCSKVQ

>PhnsLTP3

ATITCSTVYSGLEPCLNYVVGKVPSECCNGLKSLLSARTTKDLQRACYCVKSVASSVTGAQISRA  
ASIPGICKARIPFKISP DVDCSKIK

>NtnsLTP1

LTGQVQSSLAPCVPYLLGRGPLGGCCGGVKRLLGAARTPADRKTACNCLKSAANTFKGIDMGNA A  
RLPGTCGVNIPYKISPSTDCSKVQ

>AtnsLTP2

LMSCGTVNGNLAGCIAYLTRGAPLTQGCCNGVTNLKNMASTTPDRQQACRCLQSAAKAVGPGLN  
TARAAGLPSACKVNIPYKISASTNCNTVR

>AansLTP3

ISCGQVSKLTPCLGYLQKGGPVPPACCSGVKALNDAAKSTPDRQTACTCLKNAYSANS GISSSNAA  
GLPGKCGVSIPYKISPGTDCTKVQ

>AtnsLTP1

ALSCGSVNSNLAACIGYVLQGGVIPPACCSGVKNLNSIAKTTTPDRQQACNCIQGAARALG SGLNAG  
RAAGIPKACGVNIPYKISTSTNCKTVR

>AtnsLTP5

AISCGAVTGS LGQCYNYLTRGGFIPRGCCSGVQRLNSLARTTRDRQQACRCIQGAARALG SRLNAGR  
AARLPGACRVRISYPISARTNCNTVR

>NtnsLTP4

DISCGQVVASLSPCISYVRQGGAIAPCCSGINSLNNQATSTPDRQTACNCIKSAAAGISGINFSLAGS  
LPSKCGVNLPYKISPSIDCSTVQ

>StnsLTP1

LSCGEVTSGLAPCLPYLQGRGPIGGCCGGVKGLLGAAKTPEDRKTACTCLKSAANSIKGIDTGKAAGL  
PGVCGVSIPYKISPSTDCSKVQ

>NsnsLTP1-like

TAADETVTCNTVYDSLEPCLGYVLGGASVPPECCSGLKSLLSGAARTRTDRQSACQCVKSVASSATGD  
QISRAASIPGICKAKLPFKISANVDCSKIK

>CansLTP1-like

TTTTASSADGDATVTCSTVYSNLEPCLSYVLGGGLNVPSECCSGLKSLLSSTARTKSDLQSACNCVKS V  
ASRATGVQINRAAKIPGICEANIPFKISP NVDCSKIK

>StnsLTP1-like

AVSCNTVYSNLEPCLGFVLNGGPTVPSACCSGLKSLLSVAAGTTADRQSACKCIKSLASSANGVQIGRA  
SQLPGICNAHIPYQISP NVDCSKIT

>OmnsLTP

ISTVVVARAALSCSTVYNTLLPCLPYVQSGGAVPAACCGGIRSIVSAARTTADRRAACTCLKNVAAGA

AGGPYISRAAGLPGRGCVSVPFKISPNVNCNAIN

>Ph45320

AVSCGMVATDLYPCLGYVRAGGAIPECCSGIRSLFSAASTTSDRQTVNCMKSAAGAISGVNLNLA  
AGLPSKCGVNIPYKISPSIDCNNSLCLRANTLQKMKLAIFIVAMCMAAMAVMLSTPHAEAASCGQ  
VVSSLEPCISYVTKGGS LPTPCCDGIKTLNSQASTTPDRQAACNCIKSAAESINGINLKTAASLPDCGF  
TKIYERRNT
